# Supplementary material for: Crystal supramolecular motifs for [Ph4P]+ salts of [M(mnt)2]2−, [M(mnt)2]−, [{M(mnt)2}2]2−, [M(mnt)3]3− and [M(mnt)3]2− (mnt2− = maleonitriledithiolate) †
Source: Royal Society of Chemistry journal article supplement (doi:10.1039/b000093k), 2000-01-01
Supplement: b000093kt2.doc [file b000093kt2.doc]

Table S2. Selected interatomic distances and angles and other structural data for **1**-**10**

| Salt | P-Cava/Å | M-Savb/Å | M-Saxc/Å | Shortest | Shortest | Volume of Connolly surfaced / Å3 | | | Packing |
| --- | --- | --- | --- | --- | --- | --- | --- | --- | --- |
|  |  |  |  | C-H•••N /Å | C-H•••S /Å | Cation | Anion | Solvent | coeff., *k* e |
| **1** | 1.787(3) | 2.333(8) | - | 2.708(3) | 2.876(4) | 308.7(7) | 223.8(3) | - | 0.66 |
| **2** | 1.777(3) | 2.278(2) | - | 2.781(2) | 3.182(6) | 307.6(7) | 235.2(4) | - | 0.69 |
| **3** | 1.798(3) | 2.177(2) | - | 2.893(3) | 3.144(4) | 304.6(9) | 235.4(5) | - | 0.68 |
| **5** | 1.790(4) | 2.146(2) | - | 2.572(3) | 3.166(4) | 313.3(9) | 214.2(4) | - | 0.67 |
| **6** | 1.790(4) | 2.189(2) | 2.392(2) | 2.661(3) | 3.069(3) | 308.4(7) | 455.0(6) | - | 0.69 |
| ****-**8** | 1.792(4) | 2.269(2) | - | 2.730(3) | 2.786(4) | 301.9(3) | 324.7(8) | - | 0.65 |
| ****-**8** | 1.791(4) | 2.263(2) | - | 2.610(4) | 2.969(4) | 303.9(3) | 317.7(4) | - | 0.65 |
| **9** | 1.781(5) | 2.394(2) | - | 2.675(4) | 2.933(4) | 309.1(9) | 332.7(8) | 64.4(13) | 0.65 |
| **10** | 1.785(6) | 2.344(2) | - | 2.758(3) | 2.809(4) | 301.4(6) | 325.3(6) | - | 0.65 |

a Average P-C bond length. b Average M-S bond length. c M-S bond length to axial sulphur in dimeric anion. d Calculated using the CERIUS*2* molecular modelling software.33 e Where *k* = ZVmol/Vcell and Vmol is the sum of the volumes of the consituent ions of the salt, as given by the Connolly surfaces.34,35
